# Supplementary material
Source: PubMed Central journal article supplement (PMC9987387)
Supplement: 41585_2023_739_MOESM1_ESM.pdf [file 41585_2023_739_MOESM1_ESM.pdf]

---

# Vaccines as treatments for prostate cancer

---

In the format provided by the authors and unedited

| Vaccine                                                                                                    | Antigen | Combination agent(s) | Phase | Number enrolled | Study title                                                                                                                                                                                                                                      | NCT trial no. | Results / Comments | Ref |
|------------------------------------------------------------------------------------------------------------|---------|----------------------|-------|-----------------|--------------------------------------------------------------------------------------------------------------------------------------------------------------------------------------------------------------------------------------------------|---------------|--------------------|-----|
| <b>Antigen non-specific vaccines</b>                                                                       |         |                      |       |                 |                                                                                                                                                                                                                                                  |               |                    |     |
| <b>Cellular vaccines</b>                                                                                   |         |                      |       |                 |                                                                                                                                                                                                                                                  |               |                    |     |
| Irradiated autologous tumor cells                                                                          |         | BCG adjuvant         | I     | 50              | Phase I study with an autologous tumor cell vaccine for locally advanced or metastatic prostate cancer                                                                                                                                           |               |                    | [1] |
| Irradiated, GM-CSF transfected autologous tumor cells                                                      |         |                      | I     | 8               | Induction of immunity to prostate cancer antigens: results of a clinical trial of vaccination with irradiated autologous prostate tumor cells engineered to secrete granulocyte-macrophage colony-stimulating factor using ex vivo gene transfer |               |                    | [2] |
| Irradiated allogeneic human prostate carcinoma LNCaP cell line engineered to secrete IL-2 and IFN $\gamma$ |         |                      | I/II  | 25              | Phase I/II study of immunization with MHC class I matched allogeneic human prostatic carcinoma cells engineered to secrete interleukin-2 and interferon-gamma                                                                                    | NCT00002637   |                    |     |
| GVAX (irradiated GM-CSF transfected allogeneic prostate tumor cells)                                       |         |                      | I/II  | 80              | Dose escalation and efficacy trial of GVAX $^{\text{®}}$ prostate cancer vaccine                                                                                                                                                                 | NCT00140348   |                    | [3] |
| GVAX                                                                                                       |         |                      | I/II  | 50              | Prime-boost dose scheduling trial for human GM-CSF gene transduced irradiated prostate allogeneic cancer vaccine (Allogeneic Prostate GVAX $^{\text{®}}$ ) in patients with hormone-refractory prostate cancer                                   | NCT00140400   |                    |     |
| GVAX                                                                                                       |         |                      | I/II  | 36              | Vaccination priming and vaccine boosting trial of allogeneic human GM-CSF gene transduced irradiated prostate cancer cell vaccines (GVAX $^{\text{®}}$ vaccine for prostate cancer)                                                              | NCT00140374   |                    |     |
| GVAX                                                                                                       |         |                      | I/II  | 20              | Prime-boost dose scheduling trial for human GM-CSF gene transduced irradiated prostate allogeneic cancer cell vaccines (Allogeneic Prostate GVAX $^{\text{®}}$ )                                                                                 | NCT00140387   |                    |     |

|                                                                               |  |                                                                 |      |     |                                                                                                                                               |             |                                                                  |     |
|-------------------------------------------------------------------------------|--|-----------------------------------------------------------------|------|-----|-----------------------------------------------------------------------------------------------------------------------------------------------|-------------|------------------------------------------------------------------|-----|
| GVAX                                                                          |  |                                                                 | I/II | 55  | Granulocyte macrophage colony-stimulating factor--secreting allogeneic cellular immunotherapy for hormone-refractory prostate cancer          |             |                                                                  | [4] |
| GVAX                                                                          |  | Ipilimumab                                                      | I    | 28  | Combination immunotherapy with prostate GVAX and ipilimumab: safety toxicity and dose escalation                                              | NCT01510288 |                                                                  | [5] |
| GVAX                                                                          |  | Cyclophosphamide +/- fludarabine and autologous PBMCs           | I/II | 18  | GVAX in advanced prostate cancer patients made lymphopenic                                                                                    | NCT00122005 |                                                                  |     |
| GVAX                                                                          |  | Degarelix acetate and Cyclophosphamide                          | I/II | 29  | A neoadjuvant study of androgen ablation combined with cyclophosphamide and GVAX vaccine for localized prostate cancer                        | NCT01696877 |                                                                  | [6] |
| GVAX                                                                          |  | Androgen ablation - bicalutamide, goserelin, leuprolide acetate | II   | 0   | Androgen ablation therapy with or without vaccine therapy in treating patients with prostate cancer                                           | NCT00771017 | Withdrawn                                                        |     |
| GVAX                                                                          |  | Docetaxel                                                       | II   | 6   | Docetaxel and immunotherapy prior to prostatectomy for high-risk prostate cancer                                                              | NCT00577356 |                                                                  |     |
| ONY-P1<br>(irradiated prostate cancer cell lines; LNCaP, P4E6, and OnyCap-23) |  | BCG                                                             | I/II | 26  | Delayed disease progression after allogeneic cell vaccination in hormone-resistant prostate cancer and correlation with immunologic variables |             |                                                                  | [7] |
| ONY-P1                                                                        |  | BCG                                                             | II   | 54  | Vaccine Therapy in Treating Patients With Stage D0 Prostate Cancer                                                                            | NCT00514072 |                                                                  |     |
| GVAX                                                                          |  |                                                                 | III  | 626 | GVAX® vaccine for prostate cancer vs docetaxel & prednisone in patients with metastatic hormone-refractory prostate cancer                    | NCT00089856 | Terminated<br>(Based on futility analysis showing <30% chance of |     |

|                                                                                                                   |  |                                |      |     |                                                                                                                                                                          |             |                                                                                  |      |
|-------------------------------------------------------------------------------------------------------------------|--|--------------------------------|------|-----|--------------------------------------------------------------------------------------------------------------------------------------------------------------------------|-------------|----------------------------------------------------------------------------------|------|
|                                                                                                                   |  |                                |      |     |                                                                                                                                                                          |             | meeting primary endpoint)                                                        |      |
| GVAX                                                                                                              |  | Docetaxel                      | III  | 408 | Docetaxel in combination with GVAX ® immunotherapy versus docetaxel and prednisone in prostate cancer patients                                                           | NCT00133224 | Terminated (Accrual and treatment with GVAX stopped due to IDMC recommendation.) |      |
| <b>Non antigen-specific dendritic cell vaccines</b>                                                               |  |                                |      |     |                                                                                                                                                                          |             |                                                                                  |      |
| Autologous dendritic cells transfected with autologous prostate carcinoma RNA                                     |  |                                | I    | 3   | Vaccine therapy in treating patients with metastatic prostate cancer                                                                                                     | NCT00010127 |                                                                                  |      |
| Dendritic cells transfected with RNA from autologous cancer cells                                                 |  |                                | I    | N/A | Tumor RNA transfected dendritic cell vaccines                                                                                                                            | NCT00108264 |                                                                                  |      |
| DRibble vaccine (dendritic cell-targeting microvesicles containing SLiPs and DRiPs) and HPV vaccination (CERAVIX) |  | Cyclophosphamide and Imiquimod | I    | 3   | A Pilot Study of DPV-001 DRibble Vaccine With Imiquimod in Advanced Prostate Cancer                                                                                      | NCT02234921 |                                                                                  |      |
| Dendritic cells pulsed with apoptotic LNCaP cells                                                                 |  |                                | I/II | 24  | Safety and effectiveness of a vaccine for prostate cancer that uses each patients' own immune cells                                                                      | NCT00289341 |                                                                                  | [8]  |
| DCVAC/PCa (Dendritic cells pulsed with killed LNCaP prostate cancer cells)                                        |  | Docetaxel                      | I/II | 25  | Phase I/II clinical trial of dendritic-cell based immunotherapy (DCVAC/PCa) combined with chemotherapy in patients with metastatic, castration-resistant prostate cancer |             |                                                                                  | [9]  |
| Autologous dendritic cell pulsed with apoptotic PC3 cells                                                         |  |                                | I/II | 13  | Dendritic cell vaccine study (DC/PC3) for prostate cancer                                                                                                                | NCT00345293 |                                                                                  | [10] |

|                                                                                             |       |                                                 |     |      |                                                                                                                                                                                                                                              |             |                                                         |      |
|---------------------------------------------------------------------------------------------|-------|-------------------------------------------------|-----|------|----------------------------------------------------------------------------------------------------------------------------------------------------------------------------------------------------------------------------------------------|-------------|---------------------------------------------------------|------|
| alpha-type-1-polarized dendritic cells (DC1) loaded with apoptotic allogeneic tumor (LNCap) |       | Androgen ablation (Lupron or Zoladex mg)        | II  | 13   | Dendritic Cell (DC)-based vaccines loaded with allogeneic prostate cell lines in combination with androgen ablation in patients with prostate cancer                                                                                         | NCT00970203 |                                                         |      |
| Autologous dendritic cells delivered with allogeneic whole cell vaccine                     |       | allogenic whole prostate carcinoma cell vaccine | II  | 2    | Vaccine Therapy in Treating Patients With Non-Metastatic Prostate Cancer                                                                                                                                                                     | NCT00814892 |                                                         |      |
| DCVAC/PCa                                                                                   |       | Radiotherapy                                    | II  | 62   | Phase II study of DCVAC/PCa after primary radiotherapy for patients with high risk localized prostate cancer                                                                                                                                 | NCT02107430 |                                                         |      |
| DCVAC/PCa                                                                                   |       |                                                 | II  | 150  | Phase II study of DCVAC/PCa added after radical primary prostatectomy for patients with localized prostate cancer                                                                                                                            | NCT02107404 |                                                         |      |
| DCVAC/PCa                                                                                   |       | Leuprolide acetate and Goserelin Acetate        | II  | 63   | Phase II study of DCVAC/PCa added to hormone therapy for men with metastatic prostate cancer                                                                                                                                                 | NCT02107391 |                                                         |      |
| DCVAC/PCa                                                                                   |       | Docetaxel                                       | II  | 60   | Phase II study of DCVAC/PCa added to standard chemotherapy for men with metastatic castration resistant prostate cancer                                                                                                                      | NCT02105675 |                                                         |      |
| DCVAC/PCa                                                                                   |       | docetaxel and prednisone                        | III | 1182 | A Randomized, Double Blind, Multicenter, Parallel-group, Phase III Study to Evaluate Efficacy and Safety of DCVAC/PCa Versus Placebo in Men With Metastatic Castration Resistant Prostate Cancer Eligible for 1st Line Chemotherapy (VIABLE) | NCT02111577 | Did not improve overall survival of patients with mCRPC | [11] |
| <b>Antigen-specific vaccines</b>                                                            |       |                                                 |     |      |                                                                                                                                                                                                                                              |             |                                                         |      |
| <b>Cancer-associated membrane carbohydrates</b>                                             |       |                                                 |     |      |                                                                                                                                                                                                                                              |             |                                                         |      |
| MUC-2-Globo H-KLH conjugate                                                                 | MUC-2 | QS21                                            | I   | 9    | Vaccine therapy plus QS21 in treating patients with prostate cancer                                                                                                                                                                          | NCT00036933 |                                                         | [12] |

|                                                                                |                                                                        |              |      |    |                                                                                                                                    |             |  |      |
|--------------------------------------------------------------------------------|------------------------------------------------------------------------|--------------|------|----|------------------------------------------------------------------------------------------------------------------------------------|-------------|--|------|
| MUC-2-Globo H-KLH conjugate                                                    | MUC-2                                                                  | GPI-0100     | I    | 34 | Vaccine therapy plus biological therapy in treating patients with prostate cancer                                                  | NCT00016146 |  |      |
| MUC-2-KLH conjugate                                                            | MUC-2                                                                  | QS21         | I    | 15 | Vaccine therapy plus QS21 in treating patients with progressive prostate cancer                                                    | NCT00004929 |  |      |
| MUC-2-KLH conjugate                                                            | MUC-2                                                                  | QS21         | I    | 15 | Vaccination of prostate cancer patients with MUC-2-KLH conjugate plus the immunological adjuvant QS21                              | NCT00698711 |  |      |
| MUC-1-KLH conjugate                                                            | MUC-1                                                                  | QS21         | I    | 27 | Vaccine therapy plus QS21 in treating patients with prostate cancer                                                                | NCT00005632 |  |      |
| TF(c)-KLH conjugate                                                            | Thomsen - Friedenreich antigen                                         | QS21         | I    | 21 | Vaccine therapy plus QS21 in treating patients with progressive prostate cancer                                                    | NCT00003819 |  | [13] |
| Alpha (1,3) galactosyltransferase expressing irradiated allogeneic tumor cells | Alpha (1,3) galactosyltransferase                                      |              | I/II | 8  | Vaccine treatment for hormone refractory prostate cancer                                                                           | NCT00105053 |  |      |
| Carbohydrate or peptide constituent (conjugated with KLH)                      | Globohexaosylceramide (globo-H), GM2, Lewis-y, MUC-1, TF(c), and Tn(c) | QS21         | II   | 30 | Multivalent conjugate vaccine trial for patients with biochem. relapsed prostate cancer                                            | NCT00579423 |  | [14] |
| <b>Protein vaccines</b>                                                        |                                                                        |              |      |    |                                                                                                                                    |             |  |      |
| PSA/IL-2/GM-CSF (Proscavax)                                                    | PSA (Prostate specific antigen)                                        | IL-2 + GMCSF | I    | 48 | Phase 1a/1b study of PSA/IL-2/GM-CSF vaccine for recurrent prostate cancer in hormone naive and hormone independent patients (PSA) | NCT02058680 |  |      |
| JBT 1001(PSA in liposomes)                                                     | PSA                                                                    | GM-CSF       | I    | 10 | Generation of PSA-reactive effector cells after vaccination with a PSA-based vaccine in patients with prostate cancer              |             |  | [15] |

|                                                                                                                           |          |                                                  |    |     |                                                                                                                                                              |             |                                                            |      |
|---------------------------------------------------------------------------------------------------------------------------|----------|--------------------------------------------------|----|-----|--------------------------------------------------------------------------------------------------------------------------------------------------------------|-------------|------------------------------------------------------------|------|
| OVM-200                                                                                                                   | Survivin |                                                  | I  | 36  | First-in-human study of OVM-200 as a therapeutic cancer vaccine                                                                                              | NCT05104515 | Included patients with prostate, lung, and ovarian cancers |      |
| CPC-P501                                                                                                                  | P501     | AS15 (CpG 7909, monophosphoryl lipid, and QS-21) | I  | 25  | Safety & activity of P501-AS15 vaccine as a first-line treatment for patients with hormone-sensitive prostate cancer who show rising PSA                     | NCT00148928 |                                                            |      |
| IMF-001<br>(CHP-NY-ESO-1 complex consisting of recombinant NY-ESO-1 protein and cholesteryl hydrophobized pullulan (CHP)) | NY-ESO-1 |                                                  | I  | 23  | Study of IMF-001 in patients With malignancies expressing NY-ESO-1                                                                                           | NCT01234012 |                                                            |      |
| CDX-1401 (DEC-205/NY-ESO-1 fusion protein)                                                                                | NY-ESO-1 | Sirolimus                                        | I  | 18  | Vaccine therapy with or without sirolimus in treating patients with NY-ESO-1 expressing solid tumors                                                         | NCT01522820 | Included multiple tumor types                              |      |
| Recombinant soluble PSMA                                                                                                  | PSMA     | Alhydrogel                                       | I  | 14  | Vaccine therapy of prostate cancer patients with recombinant soluble prostate-specific membrane antigen (Rs-PSMA) plus the immunological adjuvant alhydrogel | NCT00705835 |                                                            |      |
| Proscavax                                                                                                                 | PSA      | IL-2 + GM-CSF                                    | II | 120 | Study of Proscavax vaccine in patients with localized prostate cancer vs active surveillance                                                                 | NCT03579654 |                                                            |      |
| <b>Peptide vaccines</b>                                                                                                   |          |                                                  |    |     |                                                                                                                                                              |             |                                                            |      |
| PSA (146-154 peptide) or DCs pulsed with PSA (146-154)                                                                    | PSA      | GM-CSF                                           | I  | 28  | Induction of specific T cell immunity in patients with prostate cancer by vaccination with PSA146-154 peptide                                                |             |                                                            | [16] |
| E75 HLA-A2 epitope from HER-2/neu                                                                                         | HER2     | Flt3L or GM-CSF                                  | I  | 20  | Pilot study of an HLA-A2 peptide vaccine using flt3 ligand as a systemic vaccine adjuvant                                                                    |             |                                                            | [17] |

|                                                                                                                                                  |                                              |                                                          |   |    |                                                                                                                                                      |             |                                                             |      |
|--------------------------------------------------------------------------------------------------------------------------------------------------|----------------------------------------------|----------------------------------------------------------|---|----|------------------------------------------------------------------------------------------------------------------------------------------------------|-------------|-------------------------------------------------------------|------|
| DPX-0907<br>(7 tumor-specific HLA-A2-restricted peptides, and a universal T Helper peptide)<br><br>lyophilized antigen/adjuvant/liposome complex | Multiple                                     | Polynucleotide adjuvant, liposome and montanide ISA51 VG | I | 23 | A phase I safety study of a cancer vaccine to treat HLA-A2 positive advanced stage ovarian, breast and prostate cancer                               | NCT01095848 | Included patients with breast, ovarian and prostate cancers | [18] |
| NY-ESO-1/LAGE-1 HLA class I and/or class II peptides                                                                                             | NY-ESO-1, LAGE-1                             |                                                          | I | 14 | Vaccine therapy in treating patients with metastatic, progressive prostate cancer                                                                    | NCT00616291 |                                                             |      |
| NY-ESO-1 protein                                                                                                                                 | NY-ESO-1                                     | CpG 7909                                                 | I | 15 | Immunization with NY-ESO-1 protein combined with CpG 7909 in patients with prostate cancer                                                           | NCT00292045 |                                                             |      |
| Personalized genomic peptides (PGV-001)                                                                                                          | variable                                     | Poly-ICLC and/or CDX-301 (rhFit-3L)                      | I | 27 | The safety and tolerability of PGV001-based personalized multi-peptide vaccines in the adjuvant setting. (PGV-Prostate)                              | NCT05010200 |                                                             |      |
| Mixed peptides                                                                                                                                   | Undisclosed tumor-associated antigens        | tetanus-based vaccine adjuvant                           | I | 18 | TENDU vaccine in patients with relapse after primary radical prostatectomy                                                                           | NCT04701021 |                                                             |      |
| Bcl-XL_42                                                                                                                                        | B-cell lymphoma extra-large protein (Bcl-XL) | CAF09b                                                   | I | 20 | Bcl-XL_42-CAF09b vaccination for patients with prostate cancer with lymph node metastases                                                            | NCT03412786 |                                                             |      |
| MUC-1 Peptide                                                                                                                                    | MUC-1                                        | GM-CSF and poly-ICLC                                     | I | 14 | MUC-1 vaccine in conjunction with Poly-ICLC in patients with recurrent and/or advanced prostate cancer                                               | NCT00374049 |                                                             |      |
| EGFRvIII peptide                                                                                                                                 | EGFR                                         | KLH or GMCSF                                             | I | 14 | S0114 vaccine therapy in treating patients with gastric, prostate, or ovarian cancer                                                                 | NCT00023634 |                                                             |      |
| TARP peptides or TARP peptide pulsed DCs                                                                                                         | TARP                                         |                                                          | I | 41 | A pilot study of vaccination with epitope-enhanced TARP peptide and TARP peptide-pulsed dendritic cells in the treatment of stage D0 prostate cancer | NCT00972309 | This trial evaluated direct peptide immunization            | [19] |



|                                                    |                                             |                                                       |      |    |                                                                                                                                    |             | n versus DC-loaded peptide |      |
|----------------------------------------------------|---------------------------------------------|-------------------------------------------------------|------|----|------------------------------------------------------------------------------------------------------------------------------------|-------------|----------------------------|------|
| PSMA and TARP peptides                             | PSMA and TARP                               | Poly IC-LC                                            | I    | 29 | PSMA and TARP peptide vaccine with Poly IC-LC adjuvant in HLA-A2 (+) patients with elevated PSA after initial definitive treatment | NCT00694551 |                            |      |
| UV1 synthetic peptide                              | hTERT                                       | GM-CSF                                                | I/II | 22 | A phase I/IIa study of UV1 vaccine in patients with prostate cancer (UV1/hTERT2012P)                                               | NCT01784913 |                            |      |
| Peptide vaccine and with or without mRNA/protamine | Multiple prostate tumor-associated peptides | Montanide ISA-51, GM-CSF, Imiquimod, and/or Protamine | I/II | 36 | Peptide-specific vaccination in HLA-A*02 positive patients with biochemical recurrence after radical prostatectomy                 | NCT02452307 |                            | [20] |
| CDCA1 (A24-56) peptide                             | CDC1 (cell division cycle associate gene-1) |                                                       | I/II | 30 | Novel peptide vaccination for patients with advanced prostate cancer                                                               | NCT01225471 |                            | [21] |
| RV001 Peptide                                      | RhoC (Ras Homolog Family Member C)          | Montanide ISA 51                                      | I/II | 22 | RV001V, a RhoC anticancer vaccine, against metastasis from solid tumours                                                           | NCT03199872 |                            | [22] |
| PEP-223 /CoVaccine HT (peptides)                   | Gonadotropin-releasing hormone receptor     |                                                       | I/II | 12 | Efficacy and safety study of the therapeutic vaccine PEP223 in prostate cancer patients                                            | NCT00895466 |                            |      |
| PSA-3 peptide                                      | PSA                                         | Montanide ISA-51                                      | II   | 44 | Vaccine therapy in treating patients with recurrent prostate cancer                                                                | NCT00030602 |                            |      |
| PSA:154-163(155L) peptide                          | PSA                                         | Incomplete Freund's adjuvant                          | II   | 32 | Vaccine therapy in treating patients with recurrent prostate cancer                                                                | NCT00109811 |                            | [23] |

|                                                                                                                          |                                                           |                                                |     |     |                                                                                                                                                                                       |             |                                               |      |
|--------------------------------------------------------------------------------------------------------------------------|-----------------------------------------------------------|------------------------------------------------|-----|-----|---------------------------------------------------------------------------------------------------------------------------------------------------------------------------------------|-------------|-----------------------------------------------|------|
| Personalized peptide vaccines                                                                                            | variable                                                  | EMP (estramustine phosphate)                   | II  | 28  | A randomized phase II trial of personalized peptide vaccine plus low dose estramustine phosphate (EMP) versus standard dose EMP in patients with castration resistant prostate cancer |             |                                               | [24] |
| PSMA peptide                                                                                                             | PSMA                                                      | IL-12                                          | II  | 13  | Vaccine therapy plus interleukin-12 in treating patients with metastatic prostate cancer that has not responded to hormone therapy                                                    | NCT00015977 |                                               |      |
| RV001 peptide                                                                                                            | RhoC                                                      | Montanide ISA 51                               | II  | 180 | Study of RV001V in biochemical failure following curatively intended therapy For localized prostate cancer (BRaVac)                                                                   | NCT04114825 |                                               |      |
| GX-301<br>hTERT (540-548) Acetate, hTERT (611-626) Acetate, hTERT (672-686) Acetate and hTERT (766-780) Acetate peptides | hTERT                                                     | Montanide ISA-51 VG and imiquimod              | II  | 98  | A phase II randomised trial of three regimens of GX301 vaccination in castration-resistant prostate cancer                                                                            | NCT02293707 |                                               | [25] |
| Tecemotide (liposome-encapsulated peptide)                                                                               | MUC-1                                                     | Radiation therapy, goserelin, cyclophosphamide | II  | 28  | Tecemotide (L-BLP25) in prostate cancer                                                                                                                                               | NCT01496131 |                                               |      |
| Personalized peptide vaccines                                                                                            | HLA-A24-restricted peptide epitopes from several proteins |                                                | III | 306 | A randomized phase III trial of personalized peptide vaccination for castration-resistant prostate cancer progressing after docetaxel                                                 |             | Did not demonstrate improved overall survival | [26] |
| <b>Antigen-loaded dendritic cell / antigen-presenting cell vaccines</b>                                                  |                                                           |                                                |     |     |                                                                                                                                                                                       |             |                                               |      |
| Dendritic cells pulsed with recombinant mouse PAP                                                                        | Xenogenic homolog of PAP                                  |                                                | I   | 21  | Dendritic cell-based xenoantigen vaccination for prostate cancer immunotherapy                                                                                                        |             |                                               | [27] |
| BPX101 (autologous DCs transduced to express                                                                             | PSMA                                                      | AP1903 to induce CD40 expression               | I   | 19  | Safety study of BPX-201 dendritic cell vaccine plus AP1903 in metastatic castrate resistant prostate cancer                                                                           | NCT01823978 |                                               | [28] |

|                                                                                          |                         |                        |      |               |                                                                                                                               |             |  |      |
|------------------------------------------------------------------------------------------|-------------------------|------------------------|------|---------------|-------------------------------------------------------------------------------------------------------------------------------|-------------|--|------|
| inducible CD40, and loaded with extracellular domain of PSMA)                            |                         |                        |      |               |                                                                                                                               |             |  |      |
| rPSMA-pulsed mature autologous dendritic cells (CaPVax)                                  | PSMA                    |                        | I    | 60            | Vaccine therapy in treating patients with metastatic prostate cancer that has not responded to hormone therapy                | NCT00005992 |  |      |
| BP-GMAX-CD1 (autologous DC targeting PSMA)                                               | PSMA                    | AP1903                 | I    | 18            | MTD study of vaccine BP-GMAX-CD1 plus AP1903 to treat castrate resistant prostate cancer                                      | NCT00868595 |  |      |
| Sipuleucel-T (autologous antigen-presenting cells loaded with PAP-GM-CSF fusion protein) | PAP                     | Ipilimumab             | I    | 9             | Sipuleucel-T and Ipilimumab for advanced prostate cancer                                                                      | NCT01832870 |  | [29] |
| Transgenic autologous lymphocytes                                                        | Telomerase              |                        | I    | 18            | Evaluation of transgenic lymphocyte immunization vaccine in subjects with prostate adenocarcinoma                             | NCT00061035 |  | [30] |
| Autologous DCs pulsed with RNA encoding PSA                                              | PSA                     |                        | I/II | 17            | Vaccine therapy in treating patients with metastatic prostate cancer                                                          | NCT00004211 |  |      |
| CreaVax-PC (antigen primed autologous DCs)                                               | PSA, PAP and KLH        |                        | I/II | 12            | Autologous dendritic cell therapy for hormone-refractory metastatic prostate cancer                                           | NCT01171729 |  |      |
| mRNA- transfected dendritic cells                                                        | Not disclosed           |                        | I/II | Not available | Trial of vaccine therapy with mRNA-transfected dendritic cells in patients with androgen resistant metastatic prostate cancer | NCT01278914 |  |      |
| Antigen loaded Dendritic Cell                                                            | PSCA, PAP, PSMA and PSA |                        | I/II | 15            | Phase I/II study of vaccination with antigen loaded dendritic cells (DCs) in hormone-refractory prostate cancer               | NCT01897207 |  |      |
| DC-Tn-MUC1 (Autologous DCs expressing Tn-MUC-1)                                          | MUC-1                   |                        | I/II | 20            | A study evaluating vaccination of prostate cancer patients with self dendritic cells expressing MUC-1                         | NCT00852007 |  |      |
| Autologous monocytes loaded with PAP-GM-CSF fusion protein                               | PAP                     | Delivered with PD-1 KO | I/II | 30            | Clinical Assessment of a Therapeutic Vaccine in Combination With PD-1                                                         | NCT03525652 |  |      |

|                                                                                                                          |                                                              |                    |      |    |                                                                                                                                                   |             |  |      |
|--------------------------------------------------------------------------------------------------------------------------|--------------------------------------------------------------|--------------------|------|----|---------------------------------------------------------------------------------------------------------------------------------------------------|-------------|--|------|
|                                                                                                                          |                                                              | autologous T cells |      |    | Knockout T Cells in the Treatment of Prostate Cancer                                                                                              |             |  |      |
| Dendritic Cells Loaded With mRNA From Primary Prostate Cancer Tissue, hTERT and Survivin                                 | mRNA From Primary Prostate Cancer Tissue, hTERT and Survivin |                    | I/II | 30 | Vaccine therapy in curative resected prostate cancer patients                                                                                     | NCT01197625 |  |      |
| Dendritic cells (DC) pulsed with two HLA-A2-specific prostate-specific membrane antigen (PSMA) peptides (PSM-P1 and -P2) | PSMA                                                         |                    | II   | 37 | Phase II prostate cancer vaccine trial: report of a study involving 37 patients with disease recurrence following primary treatment               |             |  | [31] |
| mRNA transfected dendritic cell                                                                                          | PSA, PAP, survivin and hTERT                                 | Docetaxel          | II   | 43 | Dendritic cell vaccination and docetaxel for patients with prostate cancer                                                                        | NCT01446731 |  |      |
| Peptide loaded myeloid dendritic cells (mDC) and/or plasmacytoid dendritic cells (pDC)                                   | NY-ESO-1, MUC-1 and undisclosed tumor antigens               |                    | II   | 21 | Natural dendritic cells for immunotherapy of chemo-naive metastatic castration-resistant prostate cancer patients                                 | NCT02692976 |  | [32] |
| T-cell Receptor Alternate Reading Frame Protein Dendritic Cell (DC) Vaccine                                              | TARP                                                         |                    | II   | 7  | Multi-epitope TARP peptide autologous dendritic cell vaccination in men with stage D0 prostate cancer                                             | NCT02362451 |  |      |
| Multi-Epitope TARP peptide loaded autologous dendritic cell vaccine                                                      | TARP                                                         |                    | II   | 14 | Long-term TARP vaccination using a multi-epitope TARP peptide autologous dendritic cell vaccination in previously vaccinated men on NCI 09-C-0139 | NCT02362464 |  |      |

|              |     |                                             |    |    |                                                                                                                                                                         |             |  |      |
|--------------|-----|---------------------------------------------|----|----|-------------------------------------------------------------------------------------------------------------------------------------------------------------------------|-------------|--|------|
| Sipuleucel-T | PAP |                                             | II | 47 | Sipuleucel-T manufacturing demonstration study                                                                                                                          | NCT01477749 |  |      |
| Sipuleucel-T | PAP | Abiraterone acetate (ADT)                   | II | 69 | Concurrent vs. sequential sipuleucel-T & abiraterone treatment in men with metastatic castrate resistant prostate cancer                                                | NCT01487863 |  | [33] |
| Sipuleucel-T | PAP | leuprolide acetate                          | II | 68 | Sequencing of sipuleucel-T and ADT in men with non-metastatic prostate cancer                                                                                           | NCT01431391 |  | [34] |
| Sipuleucel-T | PAP |                                             | II | 21 | Immunotherapy (APC8015, Provenge) targeting prostatic acid phosphatase can induce durable remission of metastatic androgen-independent prostate cancer: a Phase 2 trial |             |  | [35] |
| Sipuleucel-T | PAP | Radiation                                   | II | 51 | Sipuleucel-T with or without radiation therapy in treating patients with hormone-resistant metastatic prostate cancer                                                   | NCT01807065 |  | [36] |
| Sipuleucel-T | PAP | Radium 223                                  | II | 36 | Study of sipuleucel-T W/ or W/O Radium-223 in men with asymptomatic or minimally symptomatic bone-MCRPC                                                                 | NCT02463799 |  | [37] |
| Sipuleucel-T | PAP | IL-7                                        | II | 54 | CYT107 after vaccine treatment (Provenge®) in patients with metastatic castration-resistant prostate cancer                                                             | NCT01881867 |  | [38] |
| Sipuleucel-T | PAP | pTVG-HP (plasmid encoding PAP) and rhGM-CSF | II | 18 | Pilot trial of sipuleucel-t, with or without pTVG-HP DNA booster vaccine, in patients with castrate-resistant, metastatic prostate cancer                               | NCT01706458 |  | [39] |
| Sipuleucel-T | PAP | Indoximod                                   | II | 47 | Phase II study of sipuleucel-T and indoximod for patients with refractory metastatic prostate cancer                                                                    | NCT01560923 |  | [40] |
| Sipuleucel-T | PAP | Atezolizumab (Anti-PD-L1)                   | II | 37 | Clinical study of atezolizumab (Anti-PD-L1) and sipuleucel-T in patients with asymptomatic or minimally symptomatic metastatic castrate resistant prostate cancer       | NCT03024216 |  | [41] |
| Sipuleucel-T | PAP |                                             | II | 8  | Sipuleucel-T in metastatic castrate resistant prostate cancer                                                                                                           | NCT01338012 |  |      |

|                                                                                    |                           |                                           |     |     |                                                                                                                                                                                                                                        |             |                                                                                    |      |
|------------------------------------------------------------------------------------|---------------------------|-------------------------------------------|-----|-----|----------------------------------------------------------------------------------------------------------------------------------------------------------------------------------------------------------------------------------------|-------------|------------------------------------------------------------------------------------|------|
| Sipuleucel-T                                                                       | PAP                       |                                           | II  | 104 | Open label study of sipuleucel-T in metastatic prostate cancer                                                                                                                                                                         | NCT00901342 |                                                                                    |      |
| Sipuleucel-T                                                                       | PAP                       |                                           | II  | 122 | To evaluate sipuleucel-T manufactured with different concentrations of (PA2024) antigen                                                                                                                                                | NCT00715078 |                                                                                    |      |
| Sipuleucel-T                                                                       | PAP                       | CT-011 (Anti-PD1 Ab) and Cyclophosphamide | II  | 7   | Sipuleucel-T, CT-011, and cyclophosphamide for advanced prostate cancer                                                                                                                                                                | NCT01420965 |                                                                                    |      |
| Sipuleucel-T                                                                       | PAP                       | Tasquinimod                               | II  | 2   | Sipuleucel-T with or without tasquinimod in treating patients with metastatic hormone-resistant prostate cancer                                                                                                                        | NCT02159950 |                                                                                    |      |
| Sipuleucel-T                                                                       | PAP                       | Docetaxel                                 | II  | 0   | Docetaxel followed by Provenge in metastatic prostate cancer                                                                                                                                                                           | NCT02793765 | Withdrawn                                                                          |      |
| Sipuleucel-T                                                                       | PAP                       | Docetaxel                                 | II  | 0   | Provenge followed by docetaxel in castration-resistant prostate cancer                                                                                                                                                                 | NCT02793219 | Withdrawn                                                                          |      |
| Sipuleucel-T                                                                       | PAP                       |                                           | III | 176 | PROvenge treatment and early cancer treatment                                                                                                                                                                                          | NCT00779402 |                                                                                    |      |
| Sipuleucel-T                                                                       | PAP                       |                                           | III | 127 | Vaccine therapy in treating patients with metastatic prostate cancer that has not responded to hormone therapy                                                                                                                         | NCT00005947 |                                                                                    |      |
| Sipuleucel-T                                                                       | PAP                       |                                           | III | 512 | A Randomized, Double Blind, Placebo Controlled Phase 3 Trial of Immunotherapy With Autologous Antigen Presenting Cells Loading With PA2024 (Provenge(R), APC8015) in Men With Metastatic Androgen Independent Prostatic Adenocarcinoma | NCT00065442 | Prolonged overall survival relative to control group – led to FDA approval in 2010 | [42] |
| <b>Viral, bacterial, and fungal vaccines</b>                                       |                           |                                           |     |     |                                                                                                                                                                                                                                        |             |                                                                                    |      |
| Adenoviral PSA vaccine, adenoviral MUC-1 vaccine, and adenoviral Brachyury vaccine | PSA, MUC-1, and Brachyury |                                           | I   | 18  | Treatment of castration resistant prostate cancer using multi-targeted recombinant Ad5 PSA/MUC-1/Brachyury based immunotherapy vaccines                                                                                                | NCT03481816 |                                                                                    | [43] |

|                                                                                                                                        |                           |                                 |   |    |                                                                                                                                                                                                                                                            |             |  |      |
|----------------------------------------------------------------------------------------------------------------------------------------|---------------------------|---------------------------------|---|----|------------------------------------------------------------------------------------------------------------------------------------------------------------------------------------------------------------------------------------------------------------|-------------|--|------|
| Ad-sig-hMUC-1/ecdCD40L (adenoviral vector encoding MUC-1 linked to CD40L)                                                              | MUC-1                     |                                 | I | 24 | Safety study of human MUC-1 (Mucin-1) adenoviral vector vaccine for immunotherapy of epithelial cancers (MUC-1)                                                                                                                                            | NCT02140996 |  |      |
| PROSTVAC-V/TRICOM and PROSTVAC-F/TRICOM                                                                                                | PSA                       | MDX-010 (anti-CTLA4) and GM-CSF | I | 30 | Vaccine and antibody treatment of prostate cancer                                                                                                                                                                                                          | NCT00113984 |  | [44] |
| Recombinant vaccinia-PSA (L155) /TRICOM and recombinant fowlpox-PSA (L155)/TRICOM                                                      | PSA                       | Recombinant fowlpox-GM-CSF      | I | 21 | A phase I feasibility study of an intraprostatic PSA-based vaccine in men with prostate cancer with local failure following radiotherapy or cryotherapy or clinical progression on androgen deprivation therapy in the absence of local definitive therapy | NCT00096551 |  |      |
| Recombinant vaccinia virus expressing PSA (rV-PSA)                                                                                     | PSA                       | GM-CSF                          | I | 46 | Vaccine therapy in treating patients with metastatic prostate cancer                                                                                                                                                                                       | NCT00004029 |  |      |
| Adenoviral brachyury vaccine (ETBX-051), adenoviral Mucin-1 vaccine (ETBX-061), adenoviral carcinoembryonic antigen vaccine (ETBX-011) | MUC-1, CEA, and Brachyury |                                 | I | 11 | Multi-targeted recombinant Ad5 (CEA/MUC-1/Brachyury) based immunotherapy vaccine regimen in people with advanced cancer                                                                                                                                    | NCT03384316 |  | [45] |
| Recombinant vaccinia virus expressing prostate-specific antigen                                                                        | PSA                       | GM-CSF                          | I | 33 | A phase I trial of a recombinant vaccinia virus expressing prostate-specific antigen in advanced prostate cancer                                                                                                                                           |             |  | [46] |
| PROSTVAC-V (vaccinia)                                                                                                                  | PSA                       |                                 | I | 75 | A phase I study of recombinant vaccinia virus that expresses prostate specific antigen in adult patients with adenocarcinoma of the prostate                                                                                                               | NCT00001382 |  |      |

|                                                                                                                                                                                  |                             |                  |   |    |                                                                                                                                                                        |             |  |      |
|----------------------------------------------------------------------------------------------------------------------------------------------------------------------------------|-----------------------------|------------------|---|----|------------------------------------------------------------------------------------------------------------------------------------------------------------------------|-------------|--|------|
| V935 (Adenovirus-serotype 6 vector encoding hTERT) and V934-EP (plasmid DNA encoding hTERT, electroporated)                                                                      | hTERT                       |                  | I | 37 | A study of V934/V935 vaccine in cancer participants with selected solid tumors (V934-002)                                                                              | NCT00753415 |  | [47] |
| PF-06753512 (PrCa VBIR) (Adenovirus encoding 3 antigens, boosted with plasmid DNA encoding same antigens, and delivered with anti-CTLA-4 and anti-PD-1 delivered subcutaneously) | PSA<br>PSMA<br>PSCA         |                  | I | 91 | A Phase 1 Study To Evaluate Escalating Doses Of A Vaccine-Based Immunotherapy Regimen For Prostate Cancer (PrCa VBIR)                                                  | NCT02616185 |  | [48] |
| ChAdOx1.5T4 and MVA.5T4<br><br>(ChAdOx1 - chimpanzee adenovirus Ox1 and MVA - modified vaccinia Ankara)                                                                          | 5T4                         | Cyclophosphamide | I | 40 | Vaccination in prostate cancer (VANACE)                                                                                                                                | NCT02390063 |  | [49] |
| MVA-brachyury-TRICOM                                                                                                                                                             | Brachyury                   |                  | I | 38 | Safety and Tolerability of a Modified Vaccinia Ankara (MVA)-Based Vaccine Modified to Express Brachyury and T-cell Costimulatory Molecules (MVA-Brachyury-TRICOM)      | NCT02179515 |  | [50] |
| JNJ-64041809 (live attenuated double deleted (LADD) Listeria monocytogenes)                                                                                                      | PAP, NKX3.1, SSX2, and PSMA |                  | I | 26 | Safety & immunogenicity of JNJ-64041809, a live attenuated double-deleted Listeria immunotherapy, in participants with metastatic castration-resistant prostate cancer | NCT02625857 |  | [51] |
| MVA-BN-PRO (modified vaccinia Ankara-Bavarian Nordic)                                                                                                                            | PSA and PAP                 |                  | I | 24 | A safety trial of MVA-BN®-PRO in men with androgen-insensitive prostate cancer (BNIT-PR-001)                                                                           | NCT00629057 |  |      |



|                                                                        |                 |                                                                                      |      |     |                                                                                                                                                                                                                                                                         |             |                                |      |
|------------------------------------------------------------------------|-----------------|--------------------------------------------------------------------------------------|------|-----|-------------------------------------------------------------------------------------------------------------------------------------------------------------------------------------------------------------------------------------------------------------------------|-------------|--------------------------------|------|
| PF-06755992 (chimpanzee adenovirus serotype 68) and PF-06755990 (pDNA) | PSA, PSMA, PSCA | Tremelimumab (anti-CTLA4 Ab) and PF-06801591 (anti-PD1 Ab)                           | I    | 91  | A phase 1 study to evaluate escalating doses of a vaccine-based immunotherapy regimen for prostate cancer (PrCa VBIR)                                                                                                                                                   | NCT02616185 |                                |      |
| GI-6207 (Heat-killed Saccharomyces cerevisiae modified to express CEA) | CEA             |                                                                                      | I    | 25  | An open label phase I study to evaluate the safety and tolerability of a vaccine (GI-6207) consisting of whole, heat-killed recombinant saccharomyces cerevisiae (Yeast) genetically modified to express CEA protein in adults With metastatic CEA-expressing carcinoma | NCT00924092 | Includes multiple cancer types |      |
| MVA-BN-brachyury and FPV (fowlpox)-Brachyury                           | Brachyury       | M7824 (TGF- $\beta$ and PD-L1 fusion protein) N-803 (IL-15R agonist) and Epacadostat | I/II | 113 | Phase I/II study of immunotherapy combination BN-Brachyury vaccine, M7824, N-803 and epacadostat (QuEST1)                                                                                                                                                               | NCT03493945 |                                | [52] |
| BN-brachyury (MVA-BN-Brachyury + FPV-Brachyury)                        | Brachyury       | N-803 and Bintrafusp alfa                                                            | II   | 28  | N-803 alone or in combination with BN-Brachyury vaccine or Bintrafusp Alfa (M7824) for participants With castration resistant prostate cancer                                                                                                                           | NCT05445882 |                                |      |
| Adenovirus PSA vaccine                                                 | PSA             |                                                                                      | II   | 66  | Phase II study of adenovirus/PSA vaccine in men with hormone - refractory prostate cancer (APP22)                                                                                                                                                                       | NCT00583024 |                                |      |
| Adenovirus PSA vaccine                                                 | PSA             |                                                                                      | II   | 70  | Phase II study of adenovirus/PSA vaccine in men with recurrent prostate cancer after local therapy APP21                                                                                                                                                                | NCT00583752 |                                |      |
| Fowlpox PSA vaccine and/or recombinant vaccinia PSA vaccine            | PSA             |                                                                                      | II   | 60  | PSA vaccine therapy in treating patients with advanced prostate cancer                                                                                                                                                                                                  | NCT00003871 |                                |      |
| PROSTVAC-VF/TRICOM                                                     | PSA             | GM-CSF and/or <sup>153</sup> Sm-EDTMP radiation                                      | II   | 44  | <sup>153</sup> Sm-EDTMP with or without a PSA/TRICOM vaccine to treat men with androgen-insensitive prostate cancer                                                                                                                                                     | NCT00450619 |                                | [53] |

|                                                                                                          |       |                                                            |      |                |                                                                                                                                 |             |  |      |
|----------------------------------------------------------------------------------------------------------|-------|------------------------------------------------------------|------|----------------|---------------------------------------------------------------------------------------------------------------------------------|-------------|--|------|
| PROSTVAC-VF/TRICOM                                                                                       | PSA   | Flutamide and/or GM-CSF                                    | II   | 64             | Vaccine therapy with PROSTVAC/TRICOM and flutamide versus flutamide alone to treat prostate cancer                              | NCT00450463 |  |      |
| Recombinant fowlpox-PSA vaccine, recombinant vaccinia PSA vaccine, and recombinant vaccinia-B7.1 vaccine | PSA   | GM-CSF and docetaxel                                       | II   | 28 (projected) | Vaccine therapy with or without docetaxel in treating patients with metastatic prostate cancer                                  | NCT00045227 |  |      |
| PROSTVAC-VF/TRICOM                                                                                       | PSA   | Enzalutamide                                               | II   | 57             | Enzalutamide with or without vaccine therapy for advanced prostate cancer                                                       | NCT01867333 |  |      |
| PROSTVAC-VF/TRICOM                                                                                       | PSA   | Enzalutamide                                               | II   | 38             | Enzalutamide in combination with PSA-TRICOM in patients with non-metastatic castration sensitive prostate cancer                | NCT01875250 |  | [54] |
| PROSTVAC-VF/TRICOM                                                                                       | PSA   | Docetaxel and Prednisone                                   | II   | 10             | Docetaxel and prednisone with or without vaccine therapy in treating patients with metastatic hormone-resistant prostate cancer | NCT01145508 |  | [55] |
| PROSTVAC-VF/TRICOM                                                                                       | PSA   |                                                            | II   | 27             | Vaccine plus booster shots in men with prostate cancer undergoing treatment with radical prostatectomy                          | NCT02153918 |  | [56] |
| PROSTVAC-VF/TRICOM                                                                                       | PSA   | Recombinant fowlpox-GM-CSF and/or recombinant human GM-CSF | I/II | 32             | Sequential vaccinations in prostate cancer patients                                                                             | NCT00060528 |  |      |
| PROSTVAC-VF/TRICOM                                                                                       | PSA   | GM-CSF                                                     | II   | 120            | PROSTVAC®-VF/TRICOM™ vaccine for the treatment of metastatic prostate cancer after failing hormone therapy                      | NCT00078585 |  | [57] |
| MVA-MUC-1-IL2                                                                                            | MUC-1 | IL2                                                        | II   | 50             | Vaccine study of MVA-MUC1-IL2 in patients with prostate cancer                                                                  | NCT00040170 |  |      |

|                                                                           |                                                         |                                                                    |    |                |                                                                                                                                                                                 |             |  |      |
|---------------------------------------------------------------------------|---------------------------------------------------------|--------------------------------------------------------------------|----|----------------|---------------------------------------------------------------------------------------------------------------------------------------------------------------------------------|-------------|--|------|
| PROSTVAC-VF/TRICOM                                                        | PSA                                                     | Docetaxel                                                          | II | 74             | Docetaxel and PROSTVAC for metastatic castration-sensitive prostate cancer                                                                                                      | NCT02649855 |  |      |
| PROSTVAC-VF/TRICOM                                                        | PSA                                                     |                                                                    | II | 154            | PROSTVAC (PSA-TRICOM) in preventing disease progression in patients with localized prostate cancer undergoing active surveillance                                               | NCT02326805 |  | [58] |
| PROSTVAC-VF/TRICOM                                                        | PSA                                                     |                                                                    | II | 97             | Prostvac in patients with biochemically recurrent prostate cancer                                                                                                               | NCT02649439 |  |      |
| PROSTVAC-VF/TRICOM                                                        | PSA                                                     | GM-CSF and Androgen ablation                                       | II | 40             | A national multicenter phase 2 study of prostate-specific antigen (PSA) pox virus vaccine with sequential androgen ablation therapy in patients with PSA progression: ECOG 9802 |             |  | [59] |
| PROSTVAC-VF/TRICOM and CV301 (recombinant vaccinia viral vector)          | PSA, carcinoembryonic antigen (CEA) and mucin-1 (MUC-1) | MSB0011359 C (M7824, fusion of IgG1, anti-PD-L1 and TGFbetaRII)    | II | 34             | Combination immunotherapy in biochemically recurrent prostate cancer                                                                                                            | NCT03315871 |  |      |
| Recombinant vaccinia-PSA and rV-B7.1 plus recombinant fowlpox-PSA vaccine | PSA                                                     | GM-CSF and IL2 or nilutamide                                       | II | 78 (Project d) | Vaccine therapy plus sargramostim and interleukin-2 compared with nilutamide alone in treating patients with prostate cancer                                                    | NCT00020254 |  |      |
| Recombinant fowlpox-PSA vaccine and recombinant vaccinia PSA vaccine      | PSA                                                     |                                                                    | II | 86             | Vaccine therapy in treating patients with advanced adenocarcinoma of the prostate (prostate cancer)                                                                             | NCT00005039 |  |      |
| PROSTVAC-VF/TRICOM                                                        | PSA                                                     | Androgen ablation (Bicalutamide and Goserelin Acetate), and GM-CSF | II | 50             | A phase II study of PROSTVAC-V (Vaccinia)/TRICOM and PROSTVAC-F (Fowlpox)/TRICOM with GM-CSF in patients with PSA progression after local therapy for prostate cancer           | NCT00108732 |  |      |

|                                                                                                     |              |                            |      |      |                                                                                                                        |             |                                                                             |      |
|-----------------------------------------------------------------------------------------------------|--------------|----------------------------|------|------|------------------------------------------------------------------------------------------------------------------------|-------------|-----------------------------------------------------------------------------|------|
| PROSTVAC-VF/TRICOM                                                                                  | PSA          | Nivolumab (anti-PD-1 Ab)   | I/II | 29   | PROSTVAC in combination with nivolumab in men with prostate cancer                                                     | NCT02933255 |                                                                             |      |
| PROSTVAC-VF/TRICOM                                                                                  | PSA          | Ipilimumab (anti-CTLA4 Ab) | II   | 15   | Neoadjuvant PROSTVAC-VF with or without ipilimumab for prostate cancer                                                 | NCT02506114 |                                                                             |      |
| rV-PSA, rF-PSA, rV-B7.1 (V-vaccinia and F-fowlpox)                                                  | PSA and B7.1 |                            | II   | 48   | PSA-based vaccine and radiotherapy to treat localized prostate cancer                                                  | NCT00005916 |                                                                             |      |
| ChAdOx1 and MVA 5T4<br><br>(ChAdOx1 - chimpanzee adenovirus Ox1 and MVA - modified vaccinia Ankara) | 5T4          | Nivolumab                  | I/II | 23   | Vaccination in early and advanced prostate cancer                                                                      | NCT03815942 |                                                                             |      |
| TroVax (MVA encoding 5T4)                                                                           | 5T4          | Docetaxel                  | II   | 25   | TroVax® in subjects with hormone refractory prostate cancer (HRPC)                                                     | NCT01194960 |                                                                             |      |
| TroVax                                                                                              | 5T4          | Docetaxel                  | II   | 11   | Study of Trovax® plus docetaxel versus docetaxel alone in patients with progressive hormone refractory prostate cancer | NCT00521274 |                                                                             |      |
| PROSTVAC-VF/TRICOM                                                                                  | PSA          | GM-CSF                     | III  | 1297 | Phase III trial of PROSTVAC in asymptomatic or minimally symptomatic metastatic castration-resistant prostate cancer   | NCT01322490 | Although safe and well tolerated, PROSTVAC did not improve overall survival | [60] |
| <b>DNA vaccines</b>                                                                                 |              |                            |      |      |                                                                                                                        |             |                                                                             |      |
| pTVG-AR                                                                                             | AR           | GMCSF                      | I    | 40   | A phase I study of a DNA vaccine encoding Androgen Receptor Ligand-Binding Domain (AR LBD) +/-GMCSF                    | NCT02411786 |                                                                             | [61] |

|                                                                                     |          |                                                   |      |    |                                                                                                                                             |             |  |          |
|-------------------------------------------------------------------------------------|----------|---------------------------------------------------|------|----|---------------------------------------------------------------------------------------------------------------------------------------------|-------------|--|----------|
| pTVG-HP                                                                             | PAP      | Recombinant human GM-CSF                          | I    | 22 | Prostatic Acid Phosphatase (PAP) vaccine in patients with prostate cancer                                                                   | NCT00582140 |  | [62]     |
| pTVG-HP                                                                             | PAP      | rhGM-CSF                                          | II   | 17 | Two-arm study of a DNA vaccine encoding prostatic acid phosphatase (PAP) in patients with non-metastatic castrate-resistant prostate cancer | NCT00849121 |  | [63]     |
| pVAX/PSA                                                                            | PSA      | GM-CSF and IL-2                                   | I    | 9  | A phase I trial of DNA vaccination with a plasmid expressing prostate-specific antigen in patients with hormone-refractory prostate cancer  |             |  | [64]     |
| pPJV7611 (NY-ESO-1 Plasmid DNA)                                                     | NY-ESO-1 |                                                   | I    | 18 | NY-ESO-1 Plasmid DNA (pPJV7611) Cancer Vaccine                                                                                              | NCT00199849 |  |          |
| Neoantigen DNA vaccine                                                              |          | Nivolumab, Ipilimumab, and PROSTVAC               | I    | 19 | Neoantigen DNA Vaccine in Combination With Nivolumab/Ipilimumab and PROSTVAC in Metastatic Hormone-Sensitive Prostate Cancer                | NCT03532217 |  |          |
| ZYC300 (plasmid DNA encoding CYP1B1, encapsulate in poly-DL-lactide microparticles) | CYP1B1   | Cyclophosphamide                                  | I    | 22 | A study of ZYC300 administered with cyclophosphamide pre-dosing                                                                             | NCT00381173 |  |          |
| pVAXrcPSAv53I (DNA encoding rhesus PSA)                                             | PSA      |                                                   | I/II | 15 | dose finding study of a DNA vaccine delivered with intradermal electroporation in patients with prostate cancer                             | NCT00859729 |  | [65]     |
| pTVG-AR                                                                             | AR       | Nivolumab and/or androgen deprivation (Degarelix) | I/II | 39 | Androgen deprivation, with or without pTVG-AR, and with or without nivolumab, in patients with newly diagnosed, high-risk prostate cancer   | NCT04989946 |  |          |
| pTVG-HP                                                                             | PAP      | Pembrolizumab                                     | I/II | 66 | Vaccine therapy and pembrolizumab in treating patients with hormone-resistant, metastatic prostate cancer                                   | NCT02499835 |  | [66, 67] |
| DOM PSMA (Plasmid encoding immunogenic helper domain of PSMA)                       | PSMA     |                                                   | I/II | 32 | DNA fusion-gene vaccination in patients with prostate cancer induces high-frequency CD8+ T-cell responses and increases PSA doubling time   |             |  | [68]     |

|                                              |                                                               |                                     |      |     |                                                                                                                                                                   |             |                          |      |
|----------------------------------------------|---------------------------------------------------------------|-------------------------------------|------|-----|-------------------------------------------------------------------------------------------------------------------------------------------------------------------|-------------|--------------------------|------|
| MKC1106-PP<br>(recombinant plasmid pPRA-PSM) | Preferentially expressed antigen in melanoma (PRAME) and PSMA |                                     | I/II | 24  | A phase 1 study of a vaccine targeting preferentially expressed antigen in melanoma and prostate-specific membrane antigen in patients with advanced solid tumors | NCT00423254 |                          | [69] |
| pTVG-HP                                      | PAP                                                           | Recombinant human GM-CSF            | II   | 99  | Phase II PAP plus GM-CSF versus GM-CSF alone for non-metastatic prostate cancer                                                                                   | NCT01341652 |                          | [70] |
| pTVG-HP and/or pTVG-AR                       | PAP and AR                                                    | Pembrolizumab                       | II   | 60  | pTVG-HP DNA vaccine with or without pTVG-AR DNA vaccine and pembrolizumab in patients with castration-resistant, metastatic prostate cancer                       | NCT04090528 |                          |      |
| pTVG-HP                                      | PAP                                                           | Nivolumab (anti-PD-1 Ab) and GM-CSF | II   | 19  | pTVG-HP and nivolumab in patients with non-metastatic PSA-recurrent prostate cancer                                                                               | NCT03600350 |                          |      |
| <b>RNA vaccines</b>                          |                                                               |                                     |      |     |                                                                                                                                                                   |             |                          |      |
| hTERT mRNA DC                                |                                                               |                                     | I/II | 0   | Human telomerase reverse transcriptase messenger RNA (hTERT mRNA) transfected dendritic cell vaccines                                                             | NCT01153113 | Withdrawn/<br>Terminated |      |
| CV9103                                       | PSA, PSMA, PSCA and STEAP                                     |                                     | I/II | 6   | RNAActive®-derived therapeutic vaccine                                                                                                                            | NCT00906243 |                          | [71] |
| CV9103                                       | PSA, PSMA, PSCA and STEAP                                     |                                     | I/II | 48  | Safety and efficacy trial of a RNAActive®-derived prostate cancer vaccine in hormone refractory disease                                                           | NCT00831467 |                          | [72] |
| CV9104                                       | PSA, PSMA, PAP, and MUC-1                                     |                                     | I/II | 197 | Trial of RNAActive®-derived prostate cancer vaccine in metastatic castrate-refractory prostate cancer                                                             | NCT01817738 |                          |      |

|                                      |                           |            |      |     |                                                                                                                              |             |  |  |
|--------------------------------------|---------------------------|------------|------|-----|------------------------------------------------------------------------------------------------------------------------------|-------------|--|--|
| W_pro1 (serum-stable RNA lipoplexes) | Five antigens             | Cemiplimab | I/II | 130 | PRO-MERIT (Prostate cancer messenger RNA immunotherapy)                                                                      | NCT04382898 |  |  |
| CV9104                               | PSA, PSMA, PAP, and MUC-1 |            | II   | 35  | An open label randomised trial of RNaActive® cancer vaccine in high risk and intermediate risk patients with prostate cancer | NCT02140138 |  |  |

## References:

1. Berger, M., Kreutz, F. T., Horst, J. L., Baldi, A. C. and Koff, W. J. (2007). "Phase I study with an autologous tumor cell vaccine for locally advanced or metastatic prostate cancer." *J Pharm Pharm Sci* **10**: 144-52.
2. Simons, J. W., Mikhak, B., Chang, J. F., DeMarzo, A. M., Carducci, M. A., Lim, M., Weber, C. E., Baccala, A. A., Goemann, M. A., Clift, S. M., Ando, D. G., Levitsky, H. I., Cohen, L. K., Sanda, M. G., Mulligan, R. C., Partin, A. W., Carter, H. B., Piantadosi, S., Marshall, F. F. and Nelson, W. G. (1999). "Induction of immunity to prostate cancer antigens: results of a clinical trial of vaccination with irradiated autologous prostate tumor cells engineered to secrete granulocyte-macrophage colony-stimulating factor using ex vivo gene transfer." *Cancer Res*. **59**: 5160-8.
3. Higano, C. S., Corman, J. M., Smith, D. C., Centeno, A. S., Steidle, C. P., Gittleman, M., Simons, J. W., Sacks, N., Aimi, J. and Small, E. J. (2008). "Phase 1/2 dose-escalation study of a GM-CSF-secreting, allogeneic, cellular immunotherapy for metastatic hormone-refractory prostate cancer." *Cancer* **113**: 975-84.
4. Small, E. J., Sacks, N., Nemunaitis, J., Urba, W. J., Dula, E., Centeno, A. S., Nelson, W. G., Ando, D., Howard, C., Borellini, F., Nguyen, M., Hege, K. and Simons, J. W. (2007). "Granulocyte macrophage colony-stimulating factor--secreting allogeneic cellular immunotherapy for hormone-refractory prostate cancer." *Clin Cancer Res* **13**: 3883-91.
5. van den Eertwegh, A. J., Versluis, J., van den Berg, H. P., Santegoets, S. J., van Moorselaar, R. J., van der Sluis, T. M., Gall, H. E., Harding, T. C., Jooss, K., Lowy, I., Pinedo, H. M., Scheper, R. J., Stam, A. G., von Blumberg, B. M., de Gruijl, T. D., Hege, K., Sacks, N. and Gerritsen, W. R. (2012). "Combined immunotherapy with granulocyte-macrophage colony-stimulating factor-transduced allogeneic prostate cancer cells and ipilimumab in patients with metastatic castration-resistant prostate cancer: a phase 1 dose-escalation trial." *Lancet Oncol* **13**: 509-17.
6. Obradovic, A. Z., Dallos, M., Zahurak, M. L., Partin, A. W., Schaeffer, E. M., Ross, A. E., Allaf, M. E., Nirschl, T. R., Chapman, C. G., O'Neal, T., Cao, H., Durham, J. N., Guner, G., Baena-Del Valle, J. A., Ertunc, O., De Marzo, A. M., Antonarakis, E. S. and Drake, C. G. (2020). "T-Cell Infiltration and Adaptive Treg Resistance in Response to Androgen Deprivation With or Without Vaccination in Localized Prostate Cancer." *Clin Cancer Res*.
7. Michael, A., Ball, G., Quatan, N., Wushishi, F., Russell, N., Whelan, J., Chakraborty, P., Leader, D., Whelan, M. and Pandha, H. (2005). "Delayed Disease Progression after Allogeneic Cell Vaccination in Hormone-Resistant Prostate Cancer and Correlation with Immunologic Variables." *Clin Cancer Res* **11**: 4469-78.
8. Frank, M. O., Kaufman, J., Tian, S., Suarez-Farinas, M., Parveen, S., Blachere, N. E., Morris, M. J., Slovin, S., Scher, H. I., Albert, M. L. and Darnell, R. B. (2010). "Harnessing naturally occurring tumor immunity: a clinical vaccine trial in prostate cancer." *PLoS One* **5**.
9. Podrazil, M., Horvath, R., Becht, E., Rozkova, D., Bilkova, P., Sochorova, K., Hromadkova, H., Kayserova, J., Vavrova, K., Lastovicka, J., Vrabцова, P., Kubackova, K., Gasova, Z., Jarolim, L., Babjuk, M., Spisek, R., Bartunkova, J. and Fucikova, J. (2015). "Phase I/II clinical trial of dendritic-cell based immunotherapy (DCVAC/PCa) combined with chemotherapy in patients with metastatic, castration-resistant prostate cancer." *Oncotarget* **6**: 18192-205.
10. Frank, M. O., Kaufman, J., Parveen, S., Blachère, N. E., Orange, D. E. and Darnell, R. B. (2014). "Dendritic cell vaccines containing lymphocytes produce improved immunogenicity in patients with cancer." *J Transl Med* **12**: 338.
11. Vogelzang, N. J., Beer, T. M., Gerritsen, W., Oudard, S., Wiechno, P., Kukielka-Budny, B., Samal, V., Hajek, J., Feyerabend, S., Khoo, V., Stenzl, A., Csösz, T., Filipovic, Z., Goncalves, F., Prokhorov, A., Cheung, E., Hussain, A., Sousa, N., Bahl, A., Hussain, S., Fricke, H., Kadlecova, P., Scheiner, T., Korolkiewicz, R. P., Bartunkova, J. and Spisek, R. (2022). "Efficacy and Safety of Autologous Dendritic Cell-Based Immunotherapy, Docetaxel, and Prednisone vs Placebo in Patients With Metastatic Castration-Resistant Prostate Cancer: The VIABLE Phase 3 Randomized Clinical Trial." *JAMA Oncol* **8**: 546-52.
12. Slovin, S. F., Ragupathi, G., Adluri, S., Ungers, G., Terry, K., Kim, S., Spassova, M., Bornmann, W. G., Fazzari, M., Dantis, L., Olkiewicz, K., Lloyd, K. O., Livingston, P. O., Danishefsky, S. J. and Scher, H. I. (1999). "Carbohydrate vaccines in cancer: immunogenicity of a fully synthetic globo H hexasaccharide conjugate in man." *Proc. Natl. Acad. Sci. U. S. A.* **96**: 5710-5.



13. Slovin, S. F., Ragupathi, G., Musselli, C., Fernandez, C., Diani, M., Verbel, D., Danishefsky, S., Livingston, P. and Scher, H. I. (2005). "Thomsen-Friedenreich (TF) antigen as a target for prostate cancer vaccine: clinical trial results with TF cluster (c)-KLH plus QS21 conjugate vaccine in patients with biochemically relapsed prostate cancer." *Cancer Immunol Immunother* **54**: 694-702.
14. Slovin, S. F., Ragupathi, G., Fernandez, C., Diani, M., Jefferson, M. P., Wilton, A., Kelly, W. K., Morris, M., Solit, D., Clausen, H., Livingston, P. and Scher, H. I. (2007). "A polyvalent vaccine for high-risk prostate patients: "are more antigens better?"" *Cancer Immunol Immunother* **56**: 1921-30.
15. Meidenbauer, N., Harris, D. T., Spidler, L. E. and Whiteside, T. L. (2000). "Generation of PSA-reactive effector cells after vaccination with a PSA-based vaccine in patients with prostate cancer." *Prostate* **43**: 88-100.
16. Perambakam, S., Hallmeyer, S., Reddy, S., Mahmud, N., Bressler, L., DeChristopher, P., Mahmud, D., Nunez, R., Sosman, J. A. and Peace, D. J. (2006). "Induction of specific T cell immunity in patients with prostate cancer by vaccination with PSA146-154 peptide." *Cancer Immunol Immunother* **55**: 1033-42.
17. McNeel, D. G., Knutson, K. L., Schiffman, K., Davis, D. R., Caron, D. and Disis, M. L. (2003). "Pilot study of an HLA-A2 peptide vaccine using flt3 ligand as a systemic vaccine adjuvant." *J Clin Immunol* **23**: 62-72.
18. Berinstein, N. L., Karkada, M., Morse, M. A., Nemunaitis, J. J., Chatta, G., Kaufman, H., Odunsi, K., Nigam, R., Sammatour, L., MacDonald, L. D., Weir, G. M., Stanford, M. M. and Mansour, M. (2012). "First-in-man application of a novel therapeutic cancer vaccine formulation with the capacity to induce multi-functional T cell responses in ovarian, breast and prostate cancer patients." *J Transl Med* **10**: 156.
19. Wood, L. V., Fojo, A., Roberson, B. D., Hughes, M. S., Dahut, W., Gulley, J. L., Madan, R. A., Arlen, P. M., Sabatino, M., Stroncek, D. F., Castiello, L., Trepel, J. B., Lee, M. J., Parnes, H. L., Steinberg, S. M., Terabe, M., Wilkerson, J., Pastan, I. and Berzofsky, J. A. (2016). "TARP vaccination is associated with slowing in PSA velocity and decreasing tumor growth rates in patients with Stage D0 prostate cancer." *Oncoimmunology* **5**: e1197459.
20. Feyerabend, S., Stevanovic, S., Gouttefangeas, C., Wernet, D., Hennenlotter, J., Bedke, J., Dietz, K., Pascolo, S., Kuczyk, M., Rammensee, H. G. and Stenzl, A. (2009). "Novel multi-peptide vaccination in Hla-A2+ hormone sensitive patients with biochemical relapse of prostate cancer." *Prostate* **69**: 917-27.
21. Obara, W., Sato, F., Takeda, K., Kato, R., Kato, Y., Kanehira, M., Takata, R., Mimata, H., Sugai, T., Nakamura, Y. and Fujioka, T. (2017). "Phase I clinical trial of cell division associated 1 (CDCA1) peptide vaccination for castration resistant prostate cancer." *Cancer Sci* **108**: 1452-7.
22. Schuhmacher, J., Heidt, S., Balchen, T., Richardson, J. R., Schmeltz, C., Sonne, J., Schweiker, J., Rammensee, H. G., Thor Straten, P., Røder, M. A., Brasso, K. and Gouttefangeas, C. (2020). "Vaccination against RhoC induces long-lasting immune responses in patients with prostate cancer: results from a phase I/II clinical trial." *J ImmunoTher Cancer* **8**.
23. Kouivaskaia, D. V., Berard, C. A., Datena, E., Hussain, A., Dawson, N., Klyushnenkova, E. N. and Alexander, R. B. (2009). "Vaccination with agonist peptide PSA: 154-163 (155L) derived from prostate specific antigen induced CD8 T-cell response to the native peptide PSA: 154-163 but failed to induce the reactivity against tumor targets expressing PSA: a phase 2 study in patients with recurrent prostate cancer." *J Immunother* **32**: 655-66.
24. Noguchi, M., Kakuma, T., Uemura, H., Nasu, Y., Kumon, H., Hirao, Y., Moriya, F., Suekane, S., Matsuoka, K., Komatsu, N., Shichijo, S., Yamada, A. and Itoh, K. (2010). "A randomized phase II trial of personalized peptide vaccine plus low dose estramustine phosphate (EMP) versus standard dose EMP in patients with castration resistant prostate cancer." *Cancer Immunol Immunother* **59**: 1001-9.
25. Filaci, G., Fenoglio, D., Nolè, F., Zanardi, E., Tomasello, L., Aglietta, M., Del Conte, G., Carles, J., Morales-Barrera, R., Guglielmini, P., Scagliotti, G., Signori, A., Parodi, A., Kalli, F., Astone, G., Ferrera, F., Altosole, T., Lamperti, G., Criscuolo, D., Gianese, F. and Boccardo, F. (2021). "Telomerase-based GX301 cancer vaccine in patients with metastatic castration-resistant prostate cancer: a randomized phase II trial." *Cancer Immunol Immunother* **70**: 3679-92.
26. Noguchi, M., Fujimoto, K., Arai, G., Uemura, H., Hashine, K., Matsumoto, H., Fukasawa, S., Kohjimoto, Y., Nakatsu, H., Takenaka, A., Fujisawa, M., Uemura, H., Naito, S., Egawa, S., Fujimoto, H., Hinotsu, S. and Itoh, K. (2021). "A randomized phase III trial of personalized peptide vaccination for castration-resistant prostate cancer progressing after docetaxel." *Oncol Rep* **45**: 159-68.
27. Fong, L., Brockstedt, D., Benike, C., Breen, J. K., Strang, G., Ruegg, C. L. and Engleman, E. G. (2001). "Dendritic Cell-Based Xenoantigen Vaccination for Prostate Cancer Immunotherapy." *J Immunol* **167**: 7150-6.

28. Sonpavde, G., McMannis, J. D., Bai, Y., Seethammagari, M. R., Bull, J. M. C., Hawkins, V., Dancsak, T. K., Lapteva, N., Levitt, J. M., Moseley, A., Spencer, D. M. and Slawin, K. M. (2017). "Phase I trial of antigen-targeted autologous dendritic cell-based vaccine with in vivo activation of inducible CD40 for advanced prostate cancer." *Cancer Immunol Immunother* **66**: 1345-57.
29. Scholz, M., Yep, S., Chancey, M., Kelly, C., Chau, K., Turner, J., Lam, R. and Drake, C. G. (2017). "Phase I clinical trial of sipuleucel-T combined with escalating doses of ipilimumab in progressive metastatic castrate-resistant prostate cancer." *Immunotargets Ther* **6**: 11-6.
30. Zanetti, M. (2003). "Protocol #0207-545: a phase I/II, escalating dose, open-label evaluation of safety, feasibility, and tolerability of transgenic lymphocyte immunization (TLI) vaccine subjects with histologically proven prostate adenocarcinoma." *Hum Gene Ther* **14**: 301-2.
31. Murphy, G. P., Tjoa, B. A., Simmons, S. J., Ragde, H., Rogers, M., Elgamal, A., Kenny, G. M., Troychak, M. J., Salgaller, M. L. and Boynton, A. L. (1999). "Phase II prostate cancer vaccine trial: report of a study involving 37 patients with disease recurrence following primary treatment." *Prostate* **39**: 54-9.
32. Westdorp, H., Creemers, J. H. A., van Oort, I. M., Schreibelt, G., Gorris, M. A. J., Mehra, N., Simons, M., de Goede, A. L., van Rossum, M. M., Croockewit, A. J., Figdor, C. G., Witjes, J. A., Aarntzen, E., Mus, R. D. M., Brüning, M., Petry, K., Gotthardt, M., Barentsz, J. O., de Vries, I. J. M. and Gerritsen, W. R. (2019). "Blood-derived dendritic cell vaccinations induce immune responses that correlate with clinical outcome in patients with chemo-naive castration-resistant prostate cancer." *J ImmunoTher Cancer* **7**: 302.
33. Small, E. J., Lance, R. S., Gardner, T. A., Karsh, L. I., Fong, L., McCoy, C., DeVries, T., Sheikh, N. A., GuhaThakurta, D., Chang, N., Redfern, C. H. and Shore, N. D. (2015). "A Randomized Phase II Trial of Sipuleucel-T with Concurrent versus Sequential Abiraterone Acetate plus Prednisone in Metastatic Castration-Resistant Prostate Cancer." *Clin Cancer Res* **21**: 3862-9.
34. Antonarakis, E. S., Kibel, A. S., Yu, E. Y., Karsh, L. I., Elfiky, A., Shore, N. D., Vogelzang, N. J., Corman, J. M., Millard, F. E., Maher, J. C., Chang, N. N., DeVries, T., Sheikh, N. A. and Drake, C. G. (2017). "Sequencing of Sipuleucel-T and Androgen Deprivation Therapy in Men with Hormone-Sensitive Biochemically Recurrent Prostate Cancer: A Phase II Randomized Trial." *Clin Cancer Res* **23**: 2451-9.
35. Burch, P. A., Croghan, G. A., Gastineau, D. A., Jones, L. A., Kaur, J. S., Kylstra, J. W., Richardson, R. L., Valone, F. H. and Vuk-Pavlovic, S. (2004). "Immunotherapy (APC8015, Provenge) targeting prostatic acid phosphatase can induce durable remission of metastatic androgen-independent prostate cancer: a Phase 2 trial." *Prostate* **60**: 197-204.
36. Twardowski, P., Wong, J. Y. C., Pal, S. K., Maughan, B. L., Frankel, P. H., Franklin, K., Junqueira, M., Prajapati, M. R., Nachaegari, G., Harwood, D. and Agarwal, N. (2019). "Randomized phase II trial of sipuleucel-T immunotherapy preceded by sensitizing radiation therapy and sipuleucel-T alone in patients with metastatic castrate resistant prostate cancer." *Cancer Treat Res Commun* **19**: 100116.
37. Marshall, C. H., Fu, W., Wang, H., Park, J. C., DeWeese, T. L., Tran, P. T., Song, D. Y., King, S., Afful, M., Hurrelbrink, J., Manogue, C., Cotogno, P., Moldawer, N. P., Barata, P. C., Drake, C. G., Posadas, E. M., Armstrong, A. J., Sartor, O. and Antonarakis, E. S. (2021). "Randomized Phase II Trial of Sipuleucel-T with or without Radium-223 in Men with Bone-metastatic Castration-resistant Prostate Cancer." *Clin Cancer Res* **27**: 1623-30.
38. Pachynski, R. K., Morishima, C., Szmulewitz, R., Harshman, L., Appleman, L., Monk, P., Bitting, R. L., Kucuk, O., Millard, F., Seigne, J. D., Fling, S. P., Maecker, H. T., Duault, C., Ramchurren, N., Hess, B., D'Amico, L., Lacroix, A., Kaiser, J. C., Morre, M., Gregoire, A., Cheever, M., Yu, E. Y. and Fong, L. (2021). "IL-7 expands lymphocyte populations and enhances immune responses to sipuleucel-T in patients with metastatic castration-resistant prostate cancer (mCRPC)." *J ImmunoTher Cancer* **9**.
39. Wargowski, E., Johnson, L. E., Eickhoff, J. C., Delmastro, L., Staab, M. J., Liu, G. and McNeel, D. G. (2018). "Prime-boost vaccination targeting prostatic acid phosphatase (PAP) in patients with metastatic castration-resistant prostate cancer (mCRPC) using Sipuleucel-T and a DNA vaccine." *J ImmunoTher Cancer* **6**: 21.
40. Jha, G. G., Gupta, S., Tagawa, S. T., Koopmeiners, J. S., Vivek, S., Dukdek, A. Z., Cooley, S. A., Blazar, B. R. and Miller, J. S. (2017). A phase II randomized, double-blind study of sipuleucel-T followed by IDO pathway inhibitor, indoximod, or placebo in the treatment of patients with metastatic castration resistant prostate cancer (mCRPC). 2017 ASCO Annual Meeting: Abstract #3066.

41. Dorff, T., Hirasawa, Y., Acoba, J., Pagano, I., Tamura, D., Pal, S., Zhang, M., Waitz, R., Dhal, A., Haynes, W., Shon, J., Scholz, M., Furuya, H., Chan, O. T. M., Huang, J. and Rosser, C. (2021). "Phase Ib study of patients with metastatic castrate-resistant prostate cancer treated with different sequencing regimens of atezolizumab and sipuleucel-T." *J ImmunoTher Cancer* **9**.
42. Kantoff, P. W., Higano, C. S., Shore, N. D., Berger, E. R., Small, E. J., Penson, D. F., Redfern, C. H., Ferrari, A. C., Dreicer, R., Sims, R. B., Xu, Y., Frohlich, M. W. and Schellhammer, P. F. (2010). "Sipuleucel-T immunotherapy for castration-resistant prostate cancer." *N Engl J Med* **363**: 411-22.
43. Bilusic, M., McMahon, S., Madan, R. A., Karzai, F., Tsai, Y. T., Donahue, R. N., Palena, C., Jochems, C., Marté, J. L., Floudas, C., Strauss, J., Redman, J., Abdul Sater, H., Rabizadeh, S., Soon-Shiong, P., Schlom, J. and Gulley, J. L. (2021). "Phase I study of a multitargeted recombinant Ad5 PSA/MUC-1/brachyury-based immunotherapy vaccine in patients with metastatic castration-resistant prostate cancer (mCRPC)." *J ImmunoTher Cancer* **9**.
44. Theoret, M. R., Arlen, P. M., Pazdur, M., Dahut, W. L., Schlom, J. and Gulley, J. L. (2007). "Phase I trial of an enhanced prostate-specific antigen-based vaccine and anti-CTLA-4 antibody in patients with metastatic androgen-independent prostate cancer." *Clin Genitourin Cancer* **5**: 347-50.
45. Gatti-Mays, M. E., Redman, J. M., Donahue, R. N., Palena, C., Madan, R. A., Karzai, F., Bilusic, M., Sater, H. A., Marté, J. L., Cordes, L. M., McMahon, S., Steinberg, S. M., Orpia, A., Burmeister, A., Schlom, J., Gulley, J. L. and Strauss, J. (2020). "A Phase I Trial Using a Multitargeted Recombinant Adenovirus 5 (CEA/MUC1/Brachyury)-Based Immunotherapy Vaccine Regimen in Patients with Advanced Cancer." *Oncologist* **25**: 479-e899.
46. Eder, J. P., Kantoff, P. W., Roper, K., Xu, G. X., Bubley, G. J., Boyden, J., Gritz, L., Mazzara, G., Oh, W. K., Arlen, P., Tsang, K. Y., Panicali, D., Schlom, J. and Kufe, D. W. (2000). "A phase I trial of a recombinant vaccinia virus expressing prostate-specific antigen in advanced prostate cancer." *Clin Cancer Res* **6**: 1632-8.
47. Aurisicchio, L., Fridman, A., Mauro, D., Sheloditna, R., Chiappori, A., Bagchi, A. and Ciliberto, G. (2020). "Safety, tolerability and immunogenicity of V934/V935 hTERT vaccination in cancer patients with selected solid tumors: a phase I study." *J Transl Med* **18**: 39.
48. Autio, K. A., Higano, C. S., Nordquist, L. T., Appleman, L. J., Zhang, T., Zhu, X., Babiker, H. M., Vogelzang, N. J., Prasad, S., Schweizer, M. T., Billotte, S., Binder, J., Cavazos, N., Li, R., Chan, K., Cho, H., Dermeyer, M., Hollingsworth, R., Kern, K. A. and Petrylak, D. P. (2021). "First-in-human, phase I study of PF-06753512, a vaccine-based immunotherapy regimen (PrCa VBIR), in biochemical relapse (BCR) and metastatic castration-resistant prostate cancer (mCRPC)." *Journal of Clinical Oncology* **39**: 2612-.
49. Cappuccini, F., Bryant, R., Pollock, E., Carter, L., Verrill, C., Hollidge, J., Poulton, I., Baker, M., Mitton, C., Baines, A., Meier, A., Schmidt, G., Harrop, R., Protheroe, A., MacPherson, R., Kennish, S., Morgan, S., Vigano, S., Romero, P. J., Evans, T., Catto, J., Hamdy, F., Hill, A. V. S. and Redchenko, I. (2020). "Safety and immunogenicity of novel 5T4 viral vectored vaccination regimens in early stage prostate cancer: a phase I clinical trial." *J ImmunoTher Cancer* **8**.
50. Heery, C. R., Palena, C., McMahon, S., Donahue, R. N., Lepone, L. M., Grenga, I., Dirmeier, U., Cordes, L., Marté, J., Dahut, W., Singh, H., Madan, R. A., Fernando, R. I., Hamilton, D. H., Schlom, J. and Gulley, J. L. (2017). "Phase I Study of a Poxviral TRICOM-Based Vaccine Directed Against the Transcription Factor Brachyury." *Clin Cancer Res* **23**: 6833-45.
51. Drake, C. G., Pachynski, R. K., Subudhi, S. K., McNeel, D. G., Antonarakis, E. S., Bauer, T. M., Lauer, P., Brockstedt, D., Patricia, D., Wade, M., Zudaire, E., Bandyopadhyay, N., Parasrampur, D. A., Girgis, S., Mason, G. E., Knoblauch, R. E., Stone, N., Infante, J. R., Gottardis, M. M. and Fong, L. (2022). "Safety and preliminary immunogenicity of JNJ-64041809, a live-attenuated, double-deleted *Listeria monocytogenes*-based immunotherapy, in metastatic castration-resistant prostate cancer." *Prostate Cancer Prostatic Dis* **25**: 219-28.
52. Redman, J. M., Steinberg, S. M. and Gulley, J. L. (2018). "Quick efficacy seeking trial (QuEST1): a novel combination immunotherapy study designed for rapid clinical signal assessment metastatic castration-resistant prostate cancer." *J ImmunoTher Cancer* **6**: 91.
53. Heery, C. R., Madan, R. A., Stein, M. N., Stadler, W. M., Di Paola, R. S., Rauckhorst, M., Steinberg, S. M., Marté, J. L., Chen, C. C., Grenga, I., Donahue, R. N., Jochems, C., Dahut, W. L., Schlom, J. and Gulley, J. L. (2016). "Samarium-153-EDTMP (Quadramet®) with or without vaccine in metastatic castration-resistant prostate cancer: A randomized Phase 2 trial." *Oncotarget* **7**: 69014-23.
54. Madan, R. A., Karzai, F., Donahue, R. N., Al-Harthi, M., Bilusic, M., Rosner, II, Singh, H., Arlen, P. M., Theoret, M. R., Marté, J. L., Cordes, L., Couvillon, A., Hankin, A., Williams, M., Owens, H., Lochrin, S. E., Chau, C. H., Steinberg, S., Figg, W. D., Dahut, W., Schlom, J. and Gulley, J. L. (2021). "Clinical and

immunologic impact of short-course enzalutamide alone and with immunotherapy in non-metastatic castration sensitive prostate cancer." *J ImmunoTher Cancer* **9**.

55. McNeel, D. G., Chen, Y. H., Gulley, J. L., Dwyer, A. J., Madan, R. A., Carducci, M. A. and DiPaola, R. S. (2015). "Randomized phase II trial of docetaxel with or without PSA-TRICOM vaccine in patients with castrate-resistant metastatic prostate cancer: A trial of the ECOG-ACRIN cancer research group (E1809)." *Hum Vaccin Immunother* **11**: 2469-74.
56. Abdul Sater, H., Marte, J. L., Donahue, R. N., Walter-Rodriguez, B., Heery, C. R., Steinberg, S. M., Cordes, L. M., Chun, G., Karzai, F., Bilusic, M., Harmon, S. A., Turkbey, I. B., Choyke, P. L., Schlom, J., Dahut, W. L., Madan, R. A., Pinto, P. A. and Gulley, J. L. (2020). "Neoadjuvant PROSTVAC prior to radical prostatectomy enhances T-cell infiltration into the tumor immune microenvironment in men with prostate cancer." *J ImmunoTher Cancer* **8**.
57. Kantoff, P. W., Schuetz, T. J., Blumenstein, B. A., Glode, L. M., Bilhartz, D. L., Wyand, M., Manson, K., Panicali, D. L., Laus, R., Schlom, J., Dahut, W. L., Arlen, P. M., Gulley, J. L. and Godfrey, W. R. (2010). "Overall survival analysis of a phase II randomized controlled trial of a Poxviral-based PSA-targeted immunotherapy in metastatic castration-resistant prostate cancer." *J Clin Oncol* **28**: 1099-105.
58. Parsons, J. K., Pinto, P. A., Pavlovich, C. P., Uchio, E., Kim, H. L., Nguyen, M. N., Gulley, J. L., Jamieson, C., Hsu, P., Wojtowicz, M., Parnes, H., Schlom, J., Dahut, W. L., Madan, R. A., Donahue, R. N. and Chow, H. S. (2018). "A Randomized, Double-blind, Phase II Trial of PSA-TRICOM (PROSTVAC) in Patients with Localized Prostate Cancer: The Immunotherapy to Prevent Progression on Active Surveillance Study." *Eur Urol Focus* **4**: 636-8.
59. DiPaola, R. S., Chen, Y. H., Buble, G. J., Stein, M. N., Hahn, N. M., Carducci, M. A., Lattime, E. C., Gulley, J. L., Arlen, P. M., Butterfield, L. H. and Wilding, G. (2015). "A national multicenter phase 2 study of prostate-specific antigen (PSA) pox virus vaccine with sequential androgen ablation therapy in patients with PSA progression: ECOG 9802." *Eur Urol* **68**: 365-71.
60. Gulley, J. L., Borre, M., Vogelzang, N. J., Ng, S., Agarwal, N., Parker, C. C., Pook, D. W., Rathenborg, P., Flaig, T. W., Carles, J., Saad, F., Shore, N. D., Chen, L., Heery, C. R., Gerritsen, W. R., Priou, F., Langkilde, N. C., Novikov, A. and Kantoff, P. W. (2019). "Phase III Trial of PROSTVAC in Asymptomatic or Minimally Symptomatic Metastatic Castration-Resistant Prostate Cancer." *J Clin Oncol* **37**: 1051-61.
61. Kyriakopoulos, C. E., Eickhoff, J. C., Ferrari, A. C., Schweizer, M. T., Wargowski, E., Olson, B. M. and McNeel, D. G. (2020). "Multicenter Phase I Trial of a DNA Vaccine Encoding the Androgen Receptor Ligand-binding Domain (pTVG-AR, MVI-118) in Patients with Metastatic Prostate Cancer." *Clin Cancer Res* **26**: 5162-71.
62. McNeel, D. G., Dunphy, E. J., Davies, J. G., Frye, T. P., Johnson, L. E., Staab, M. J., Horvath, D. L., Straus, J., Alberti, D., Marnocha, R., Liu, G., Eickhoff, J. C. and Wilding, G. (2009). "Safety and immunological efficacy of a DNA vaccine encoding prostatic acid phosphatase in patients with stage D0 prostate cancer." *J Clin Oncol* **27**: 4047-54.
63. McNeel, D. G., Becker, J. T., Eickhoff, J. C., Johnson, L. E., Bradley, E., Pohlkamp, I., Staab, M. J., Liu, G., Wilding, G. and Olson, B. M. (2014). "Real-time immune monitoring to guide plasmid DNA vaccination schedule targeting prostatic acid phosphatase in patients with castration-resistant prostate cancer." *Clin Cancer Res* **20**: 3692-704.
64. Pavlenko, M., Roos, A. K., Lundqvist, A., Palmborg, A., Miller, A. M., Ozenci, V., Bergman, B., Egevad, L., Hellstrom, M., Kiessling, R., Masucci, G., Wersall, P., Nilsson, S. and Pisa, P. (2004). "A phase I trial of DNA vaccination with a plasmid expressing prostate-specific antigen in patients with hormone-refractory prostate cancer." *Br J Cancer* **91**: 688-94.
65. Eriksson, F., Totterman, T., Maltais, A. K., Pisa, P. and Yachnin, J. (2013). "DNA vaccine coding for the rhesus prostate specific antigen delivered by intradermal electroporation in patients with relapsed prostate cancer." *Vaccine* **31**: 3843-8.
66. McNeel, D. G., Eickhoff, J. C., Wargowski, E., Zahm, C., Staab, M. J., Straus, J. and Liu, G. (2018). "Concurrent, but not sequential, PD-1 blockade with a DNA vaccine elicits anti-tumor responses in patients with metastatic, castration-resistant prostate cancer." *Oncotarget* **P9**: 25586-96.
67. McNeel, D. G., Eickhoff, J. C., Wargowski, E., Johnson, L. E., Kyriakopoulos, C. E., Emamekhoo, H., Lang, J. M., Brennan, M. J. and Liu, G. (2022). "Phase 2 trial of T-cell activation using MVI-816 and pembrolizumab in patients with metastatic, castration-resistant prostate cancer (mCRPC)." *J ImmunoTher Cancer* **10**.

68. Chudley, L., McCann, K., Mander, A., Tjelle, T., Campos-Perez, J., Godeseth, R., Creak, A., Dobbyn, J., Johnson, B., Bass, P., Heath, C., Kerr, P., Mathiesen, I., Dearnaley, D., Stevenson, F. and Ottensmeier, C. (2012). "DNA fusion-gene vaccination in patients with prostate cancer induces high-frequency CD8(+) T-cell responses and increases PSA doubling time." *Cancer Immunol Immunother* **61**: 2161-70.
69. Weber, J. S., Vogelzang, N. J., Ernstoff, M. S., Goodman, O. B., Cranmer, L. D., Marshall, J. L., Miles, S., Rosario, D., Diamond, D. C., Qiu, Z., Obrocea, M. and Bot, A. (2011). "A phase 1 study of a vaccine targeting preferentially expressed antigen in melanoma and prostate-specific membrane antigen in patients with advanced solid tumors." *J Immunother* **34**: 556-67.
70. McNeel, D. G., Eickhoff, J. C., Johnson, L. E., Roth, A. R., Perk, T. G., Fong, L., Antonarakis, E. S., Wargowski, E., Jeraj, R. and Liu, G. (2019). "Phase II Trial of a DNA Vaccine Encoding Prostatic Acid Phosphatase (pTVG-HP [MVI-816]) in Patients With Progressive, Nonmetastatic, Castration-Sensitive Prostate Cancer." *J Clin Oncol* **37**: 3507-17.
71. Kubler, H., Scheel, B., Gnad-Vogt, U., Miller, K., Schultze-Seemann, W., Vom Dorp, F., Parmiani, G., Hampel, C., Wedel, S., Trojan, L., Jocham, D., Maurer, T., Rippin, G., Fotin-Mleczek, M., von der Mulbe, F., Probst, J., Hoerr, I., Kallen, K. J., Lander, T. and Stenzl, A. (2015). "Self-adjuvanted mRNA vaccination in advanced prostate cancer patients: a first-in-man phase I/IIa study." *J Immunother Cancer* **3**: 26.
72. Fotin-Mleczek, M., Duchardt, K. M., Lorenz, C., Pfeiffer, R., Ojkić-Zrna, S., Probst, J. and Kallen, K. J. (2011). "Messenger RNA-based vaccines with dual activity induce balanced TLR-7 dependent adaptive immune responses and provide antitumor activity." *J Immunother* **34**: 1-15.
